# Supplementary material for: Technical note: A stochastic framework for identification and evaluation of flash drought
Source: Copernicus journal article supplement (doi:10.5194/hess-27-1077-2023), 2023-03-14
Supplement: Supplementary file 1 [file hess-27-1077-2023-supplement.pdf]

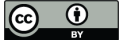

*Supplement of*

**Technical note: A stochastic framework for identification and evaluation of flash drought**

**Yuxin Li et al.**

*Correspondence to:* Jun Yin ([jun.yin@nuist.edu.cn](mailto:jun.yin@nuist.edu.cn))

The copyright of individual parts of the supplement might differ from the article licence.

## Supplementary Text

potential evapotranspiration,  $E_{\max}$ , is often estimated by Penman equation

$$E_{\max} = \underbrace{\frac{\Delta}{\rho_w \lambda_w (\Delta + \gamma)} Q}_{E_e} + \underbrace{\frac{\gamma}{\rho_w (\Delta + \gamma)} \left( \frac{\varepsilon}{p_0} \rho g_a \text{VPD} \right)}_{E_v}, \quad (1)$$

where  $E_e$  is equilibrium evapotranspiration,  $E_v$  is the evapotranspiration due to drying power of the air,  $\Delta$  is the slope of the saturation vapor pressure curve (a nonlinear function of air temperature),  $\gamma$  is psychrometric constant,  $\lambda_w$  is latent heat of water vaporization,  $Q$  is available surface energy,  $\varepsilon$  is the ratio of the gas constant for dry air to that of water vapor,  $p_0$  is near-surface air pressure,  $\rho$  is air density,  $\rho_w$  water density,  $g_a$  is aerodynamic conductance, and VPD is vapor pressure deficit. Heatwave is often accompanied with high temperature and strong solar radiation, which tend to increase  $E_e$ ; dry or moist heatwaves may also have abnormal VPD, which may influence  $E_v$ .

## Supplementary Figures

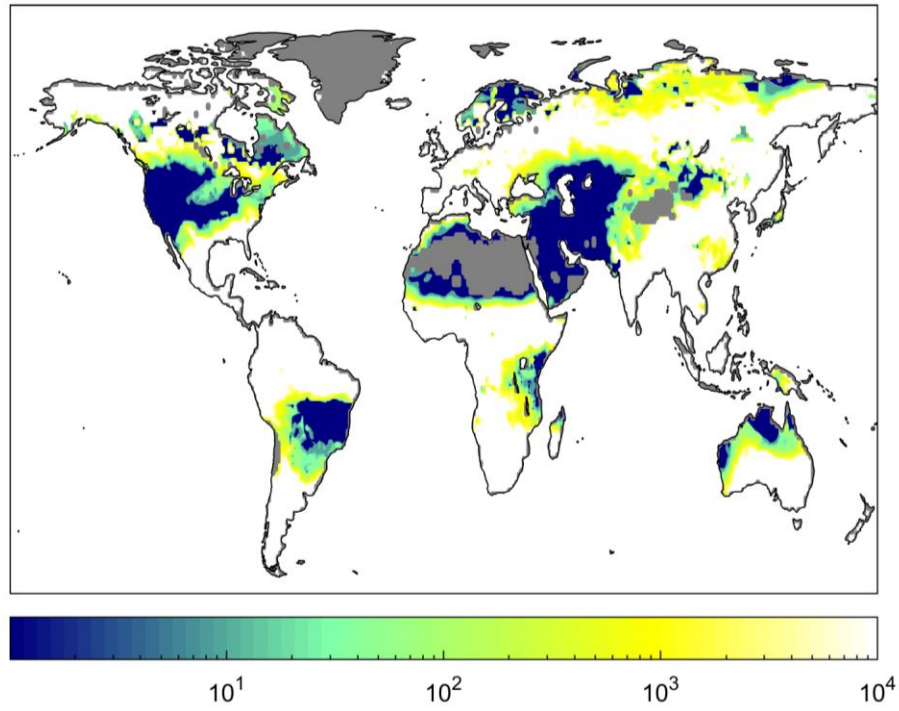

Fig. S1. Global distribution of the variance of the mean first passage time (VFPT) (units:  $\text{day}^2$ ). The gray areas are hyper-arid regions, which are excluded from this analysis.
